# Supplementary material
Source: PubMed Central journal article supplement (PMC8791070)
Supplement: ehp9086.smcontents.508.pdf [file ehp9086.smcontents.508.pdf]

*Environ Health Perspect*

DOI: 10.1289/EHP9086

**Note to readers with disabilities:** *EHP* strives to ensure that all journal content is accessible to all readers. However, some figures and Supplemental Material published in *EHP* articles may not conform to [508 standards](#) due to the complexity of the information being presented. If you need assistance accessing journal content, please contact [ehp508@niehs.nih.gov](mailto:ehp508@niehs.nih.gov). Our staff will work with you to assess and meet your accessibility needs within 3 working days.

### **Supplemental Material**

#### **A Children's Health Perspective on Nano- and Microplastics**

Kam Sripada, Aneta Wierzbicka, Khaled Abass, Joan O. Grimalt, Andreas Erbe, Halina B. Röllin, Pál Weihe, Gabriela Jiménez Díaz, Randolph Reyes Singh, Torkild Visnes, Arja Rautio, Jon Øyvind Odland, and Martin Wagner

#### **Table of Contents**

#### **Literature search bibliography**
